# Supplementary material for: FBP17-mediated finger-like membrane protrusions in cell competition between normal and RasV12-transformed cells
Source: PubMed Central journal article supplement — iScience. 2021 Aug 18;24(9):102994. doi: 10.1016/j.isci.2021.102994 (PMC8405961; doi:10.1016/j.isci.2021.102994), 2021-08-18
Supplement: mmc1.pdf [file mmc1.pdf]

**Supplemental information**

**FBP17-mediated finger-like membrane  
protrusions in cell competition  
between normal and RasV12-transformed cells**

**Tomoko Kamasaki, Yumi Miyazaki, Susumu Ishikawa, Kazuya Hoshiba, Keisuke Kuromiya, Nobuyuki Tanimura, Yusuke Mori, Motosuke Tsutsumi, Tomomi Nemoto, Ryota Uehara, Shiro Suetsugu, Toshiki Itoh, and Yasuyuki Fujita**

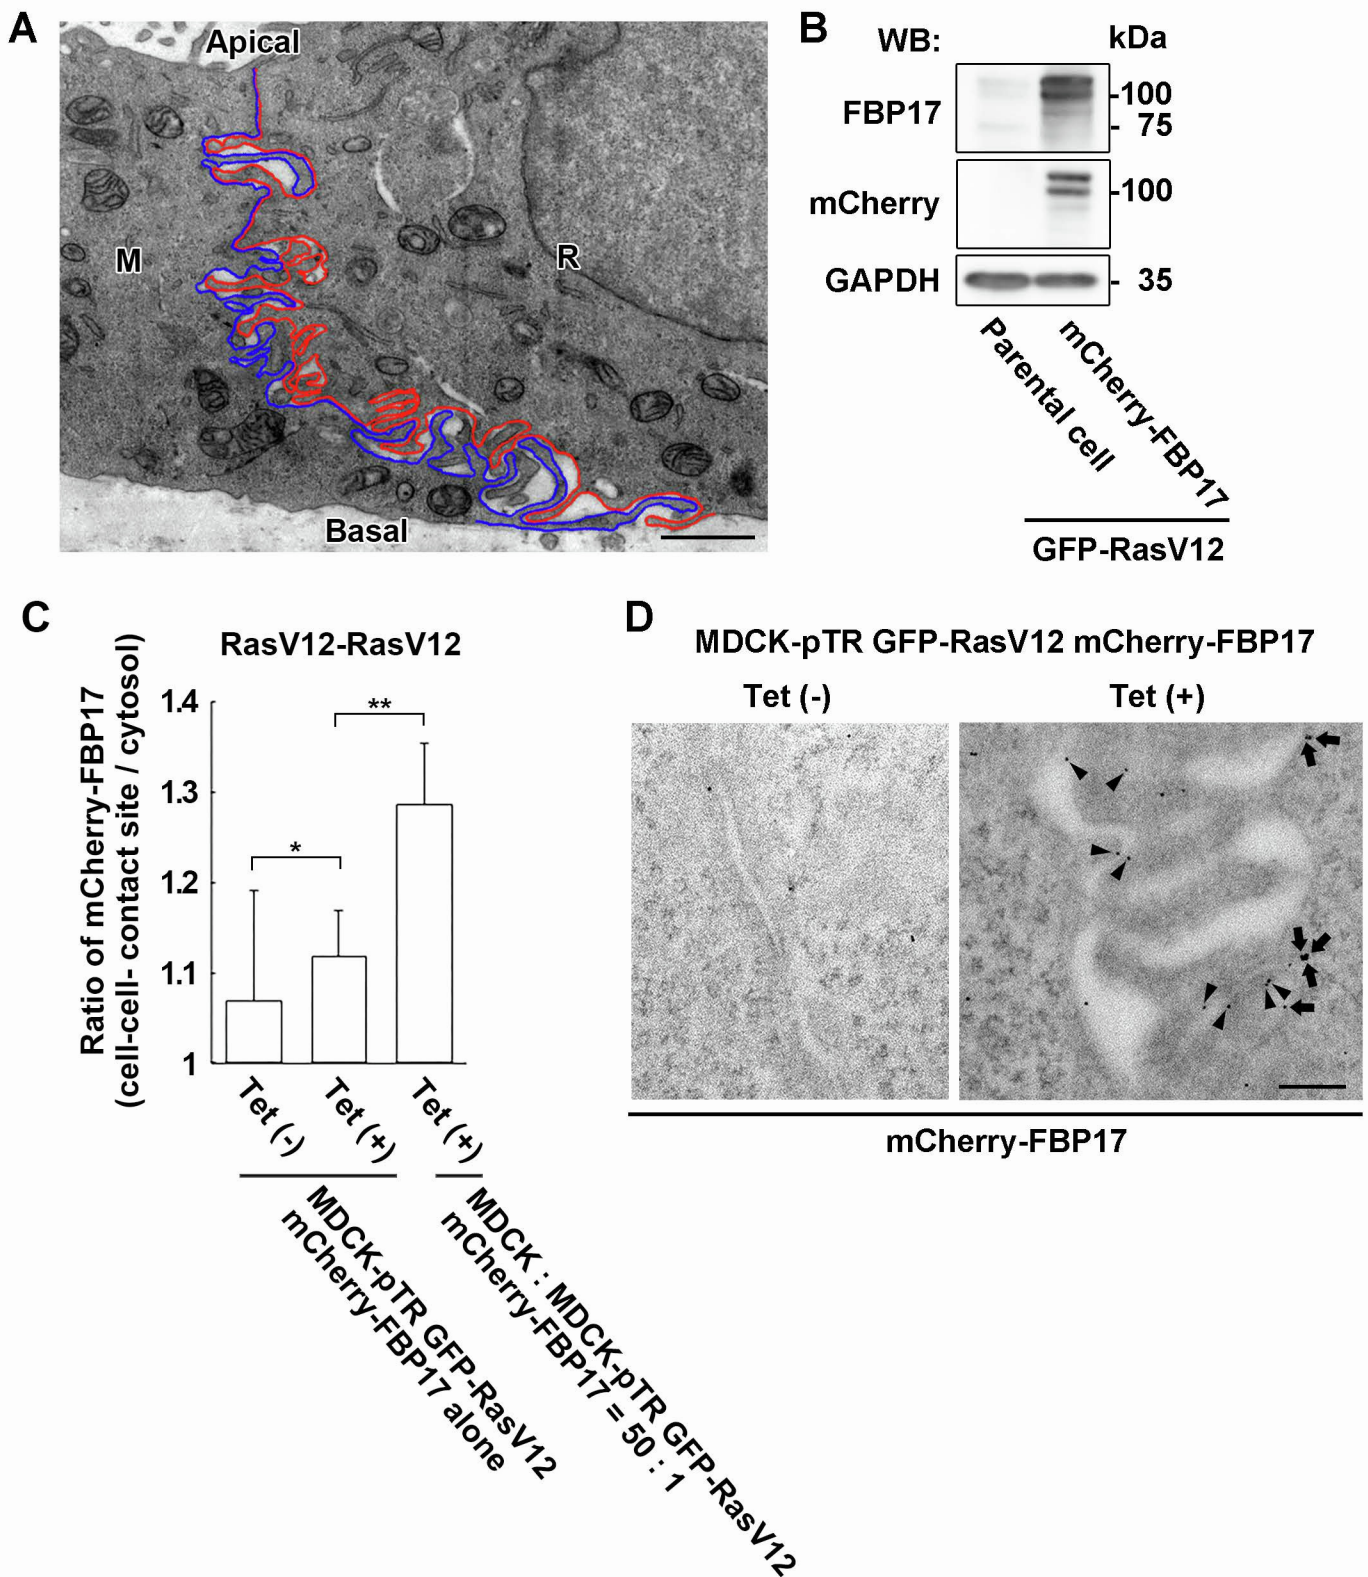

**Figure S1.** FBP17 is localized at wavy cell membranes (Related to Figures 1 and 2). (A) The X-Z EM image of the interface between normal and RasV12-transformed MDCK cells. Cell membranes of normal and RasV12 cells at cell-cell contacts are colored in blue and red, respectively. Scale bar, 1  $\mu$ m. (B) Establishment of MDCK-pTR GFP-RasV12 cells stably expressing mCherry-FBP17. Cell lysates were analyzed by western blotting with the indicated antibodies. (C) Quantification of the ratio of mCherry-FBP17 fluorescence (cell-cell contact site/cytosol) between MDCK-pTR GFP-RasV12 mCherry-FBP17 cells. MDCK-pTR GFP-RasV12 cells stably expressing mCherry-FBP17 were cultured alone or mix-cultured with normal cells in the absence or presence of tetracycline for 16 h. The analysis corresponds to Figure 2A. Data are mean  $\pm$  SD. \* $P$  < 0.05, \*\* $P$  < 0.01 (unpaired two-tailed Student's  $t$ -tests). (D) Immuno-EM images of mCherry-FBP17 at the intercellular region between MDCK-pTR GFP-RasV12 mCherry-FBP17 cells in the absence or presence of tetracycline. Cells were fixed at 16 h after the induction of RasV12 and sectioned along the X-Y axis. The arrowheads and arrows indicate gold particles localized along and at the base of the intercellular protrusions, respectively. Scale bar, 0.2  $\mu$ m.

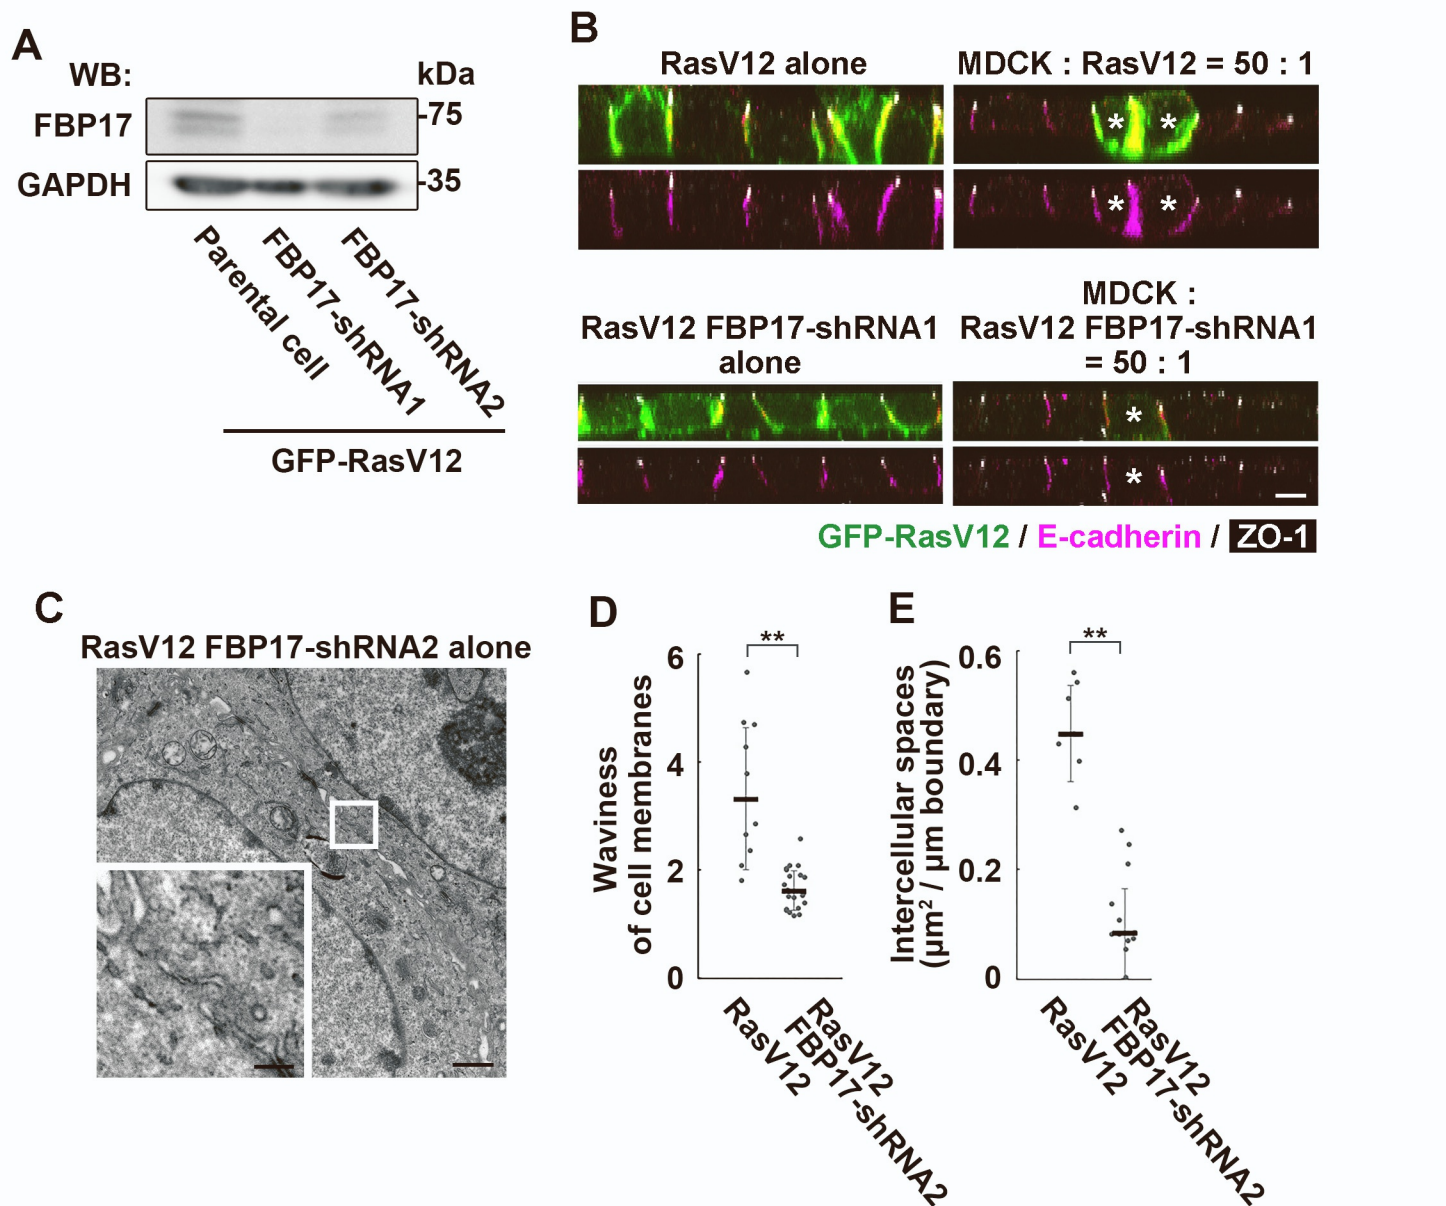

**Figure S2. FBP17 in RasV12 cells regulates the formation of finger-like membrane protrusions (Related to Figure 3).**

(A) Establishment of MDCK-pTR GFP-RasV12 cells stably expressing FBP17-shRNA1 or 2. Cell lysates were analyzed by western blotting with the indicated antibodies. (B) Immunofluorescence images showing single or mix cultures of RasV12 or FBP17-knockdown RasV12 cells surrounded by normal cells. Asterisks represent RasV12 or RasV12 FBP17-shRNA1 cells in the mix culture. Scale bar, 10  $\mu\text{m}$ . (C) EM images of RasV12 cells stably expressing FBP17-shRNA2. Cells were fixed at 24 h after the induction of RasV12. The area in the white box is shown as inset at higher magnification, demonstrating the intercellular region. Scale bars, 1  $\mu\text{m}$ ; 0.2  $\mu\text{m}$  (inset). (D, E) Quantification of waviness of cell membranes (D) and intercellular spaces (E) in RasV12 cells or RasV12 FBP17-shRNA2 cells. Note that the results are comparable to Figures 3B and 3C for RasV12 FBP17-shRNA1. Data are median  $\pm$  SD. \*\*P < 0.01 (unpaired two-tailed Student's *t*-tests).

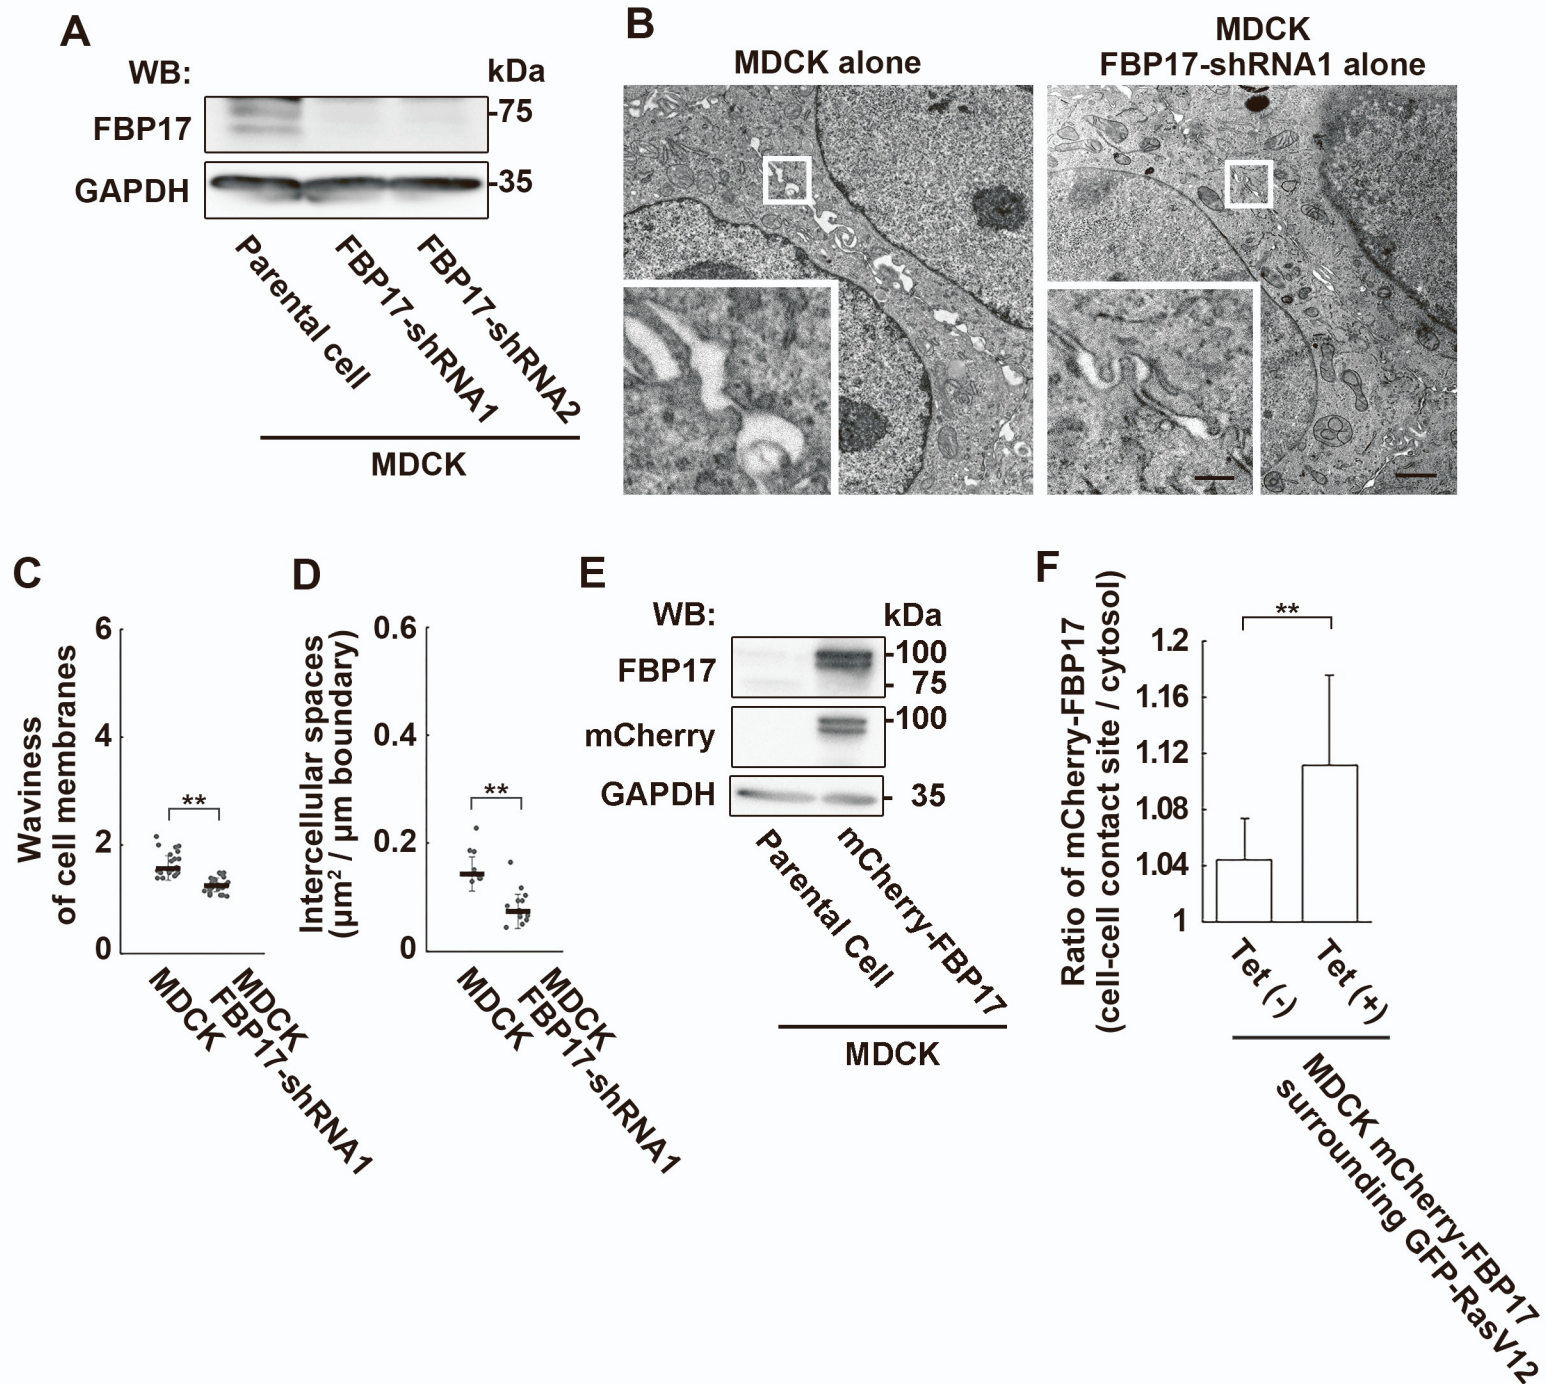

**Figure S3. FBP17 accumulates at cell-cell contacts in normal cells surrounding RasV12 cells (Related to Figures 3 and 5).** (A, E) Establishment of MDCK cells stably expressing FBP17-shRNA1 or 2 (A) or mCherry-FBP17 (E). Cell lysates were analyzed by western blotting with the indicated antibodies. (B) EM images of MDCK cells or MDCK cells stably expressing FBP17-shRNA1. Cells were fixed at 16 h after the addition of tetracycline. The area in the white box is shown as inset at higher magnification, demonstrating intercellular regions. Scale bars, 1  $\mu\text{m}$ ; 0.2  $\mu\text{m}$  (inset). (C, D) Quantification of waviness of cell membranes (C) and intercellular spaces (D) in MDCK cells or MDCK FBP17-shRNA1 cells. Data are median  $\pm$  SD. \*\* $P < 0.01$  (unpaired two-tailed Student's *t*-tests). (F) Quantification of the ratio of mCherry-FBP17 fluorescence (cell-cell contact site/cytosol) at the boundary between MDCK mCherry-FBP17 cells that surround MDCK-pTR GFP-RasV12 cells. Cell boundaries between the first and second row of the surrounding MDCK mCherry-FBP17 cells were analyzed. Cells were cultured in the absence or presence of tetracycline for 16 h. Data are mean  $\pm$  SD. \*\* $P < 0.01$  (unpaired two-tailed Student's *t*-tests)The analysis corresponds to Figure 5B.

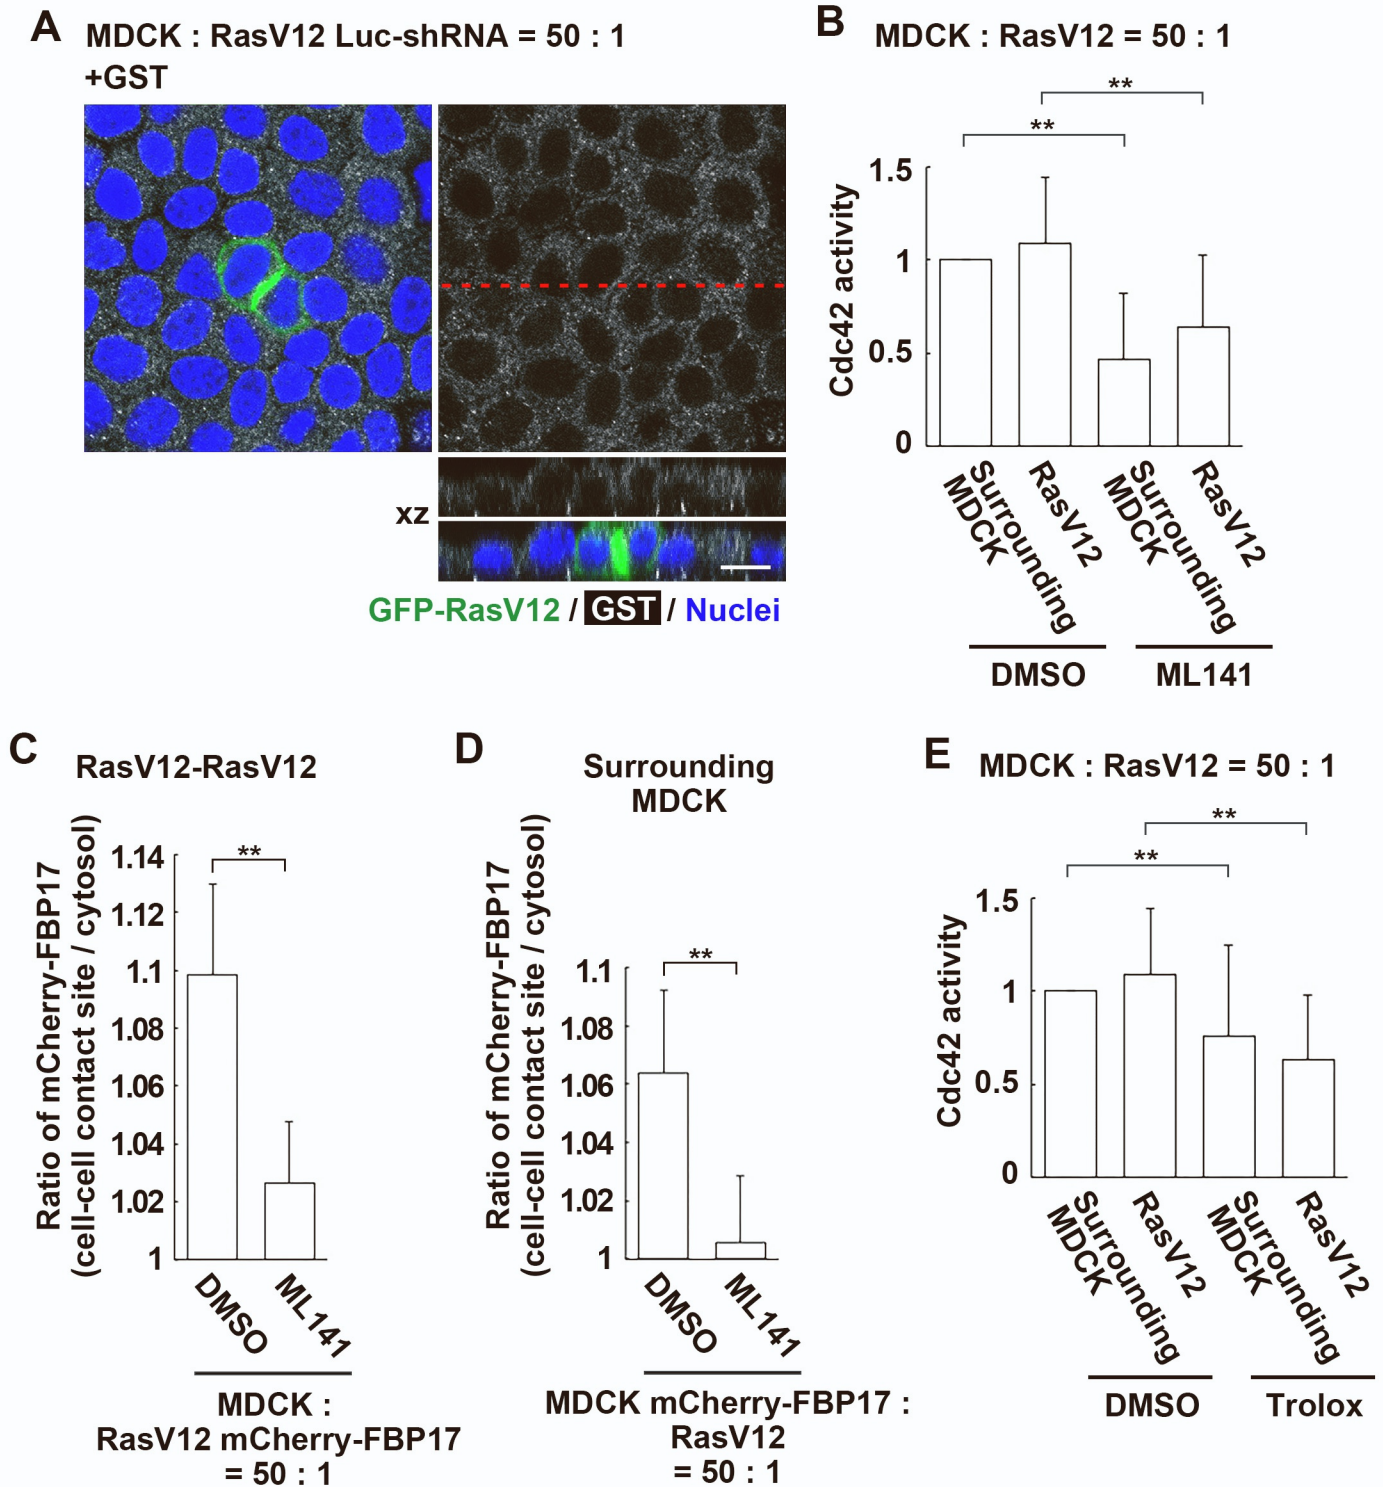

**Figure S4.** Indirect-immunofluorescence analysis for Cdc42 activity (Related to Figure 6). (A) Negative control for *cdc42* activity assay in mix culture of normal and RasV12-transformed cells. At 16 h after the induction of RasV12, cells were treated with GST proteins and then stained with anti-GST antibody. RasV12 cells stably expressing Luc-shRNA were used as control for RasV12 FBP17-shRNA1 cells. Scale bar, 10  $\mu$ m. (B, E) Quantification of the *cdc42* activity in mix cultures of normal and RasV12-transformed cells in the absence or presence of the *cdc42* inhibitor ML141 (B) or the antioxidant Trolox (E). Values of pixel intensity in the cytoplasm were measured and expressed as a ratio relative to Surrounding MDCK. Differences of pixel intensity between GST-WASP-CRIB and GST were calculated in each condition. (C, D) Quantification of the ratio of mCherry-FBP17 fluorescence (cell-cell contact site/cytosol) at the boundary between MDCK and MDCK-pTR GFP-RasV12 mCherry-FBP17 cells (C) or MDCK mCherry-FBP17 and MDCK-pTR GFP-RasV12 cells (D). Cells were cultured in the presence of DMSO or ML141 and tetracycline for 16 h. The analyses correspond to Figures 6C and 6D, respectively. (B-E) Data are mean  $\pm$  SD. \*\*  $P < 0.01$  (unpaired two-tailed Student's *t*-tests).

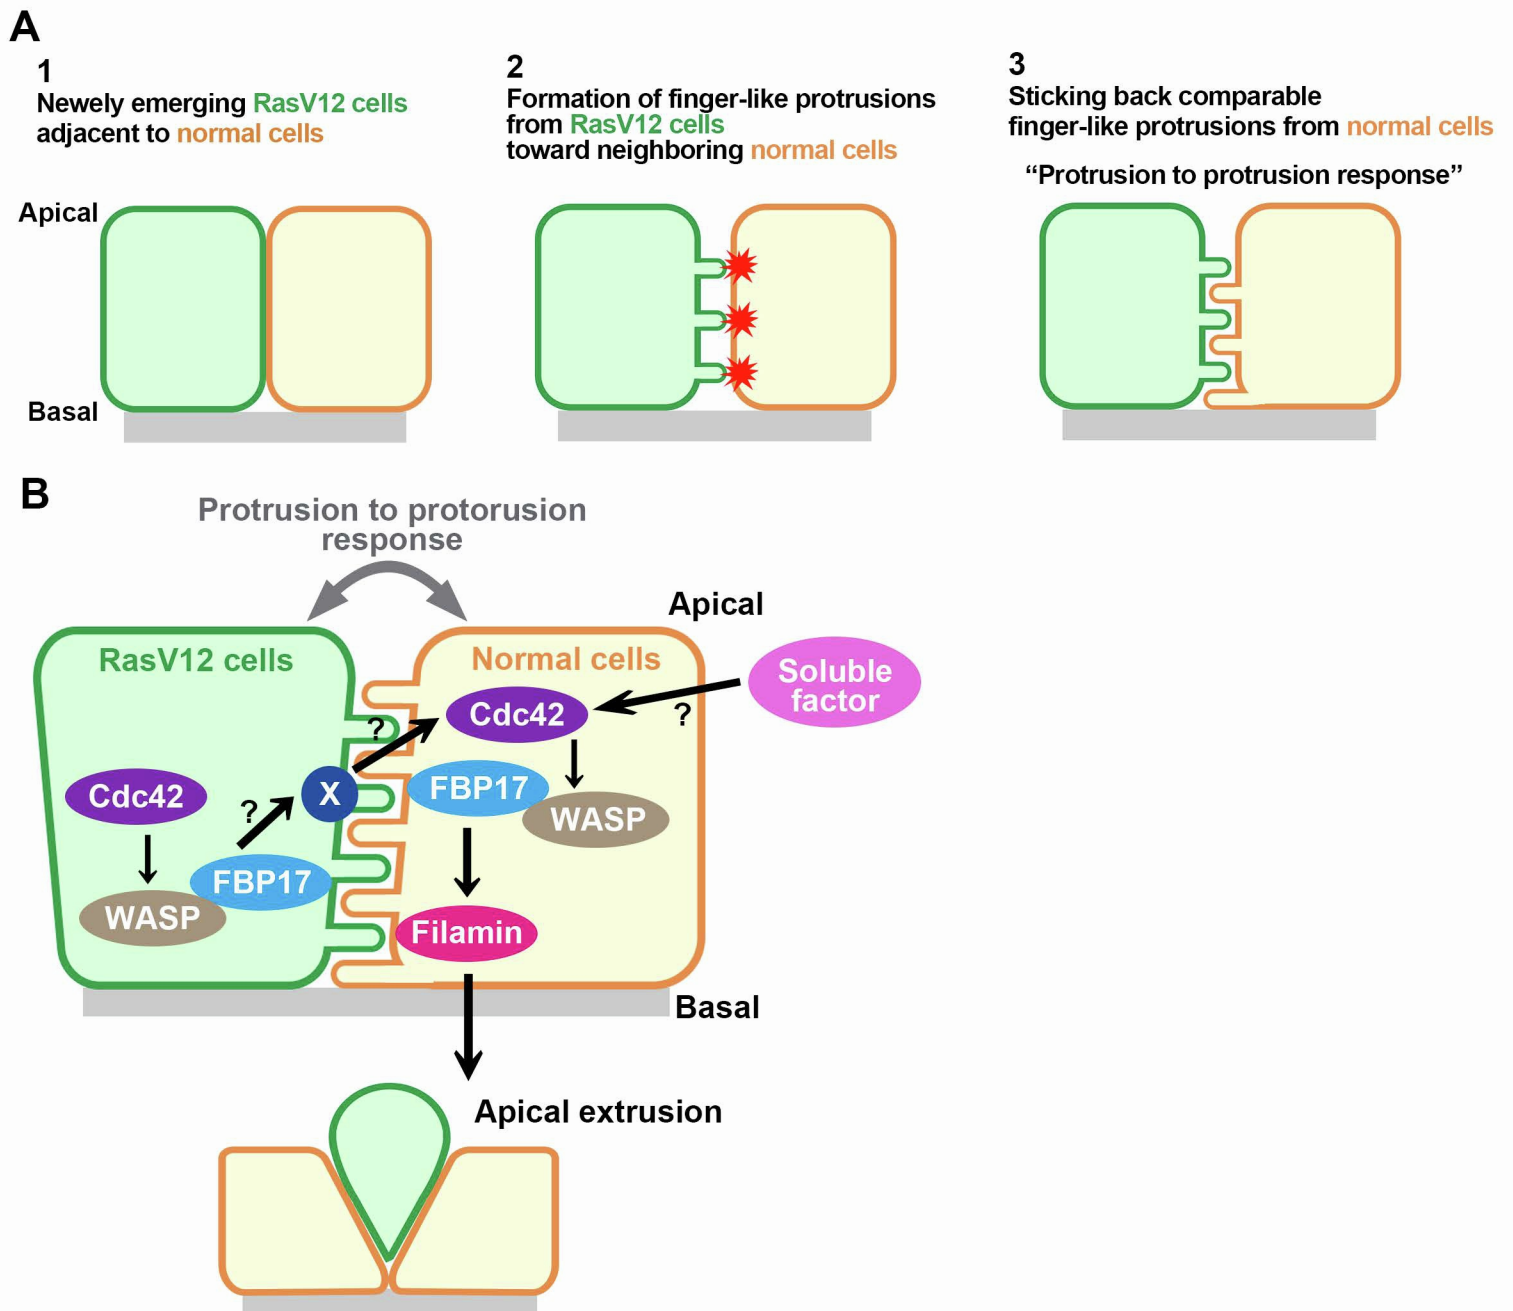

**Figure S5. Molecular mechanisms of apical extrusion of RasV12-transformed cells (Related to DISCUSSION).**

(A) A schematic model for ‘protrusion to protrusion response’ between normal and RasV12-transformed cells. First, RasV12-transformed cells emerge within the epithelial layer adjacent to normal cells (1). RasV12-transformed cells form finger-like membrane protrusions toward the neighboring normal cells at their cell-cell contact sites (2). Then, normal cells somehow sense the protrusions and respond to them by sticking back comparable finger-like membrane protrusions (3). (B) Schematics for molecular mechanisms of apical extrusion of transformed cells via cdc42/FBP17-mediated protrusions.
